# Supplementary material for: Comparison of Propylthiouracil vs Methimazole for Thyroid Storm in Critically Ill Patients
Source: PubMed Central journal article supplement (PMC10111182; doi:10.1001/jamanetworkopen.2023.8655), 2023-04-17
Supplement: jamanetwopen-e238655-s002.pdf [file jamanetwopen-e238655-s002.pdf]

## Data Sharing Statement

Lee. Comparison of Propylthiouracil vs Methimazole for Thyroid Storm in Critically Ill Patients. *JAMA Netw Open*. Published April 17, 2023. doi:10.1001/jamanetworkopen.2023.8655

### Data

**Data available:** No

### Additional Information

**Explanation for why data not available:** The Premier Healthcare Database is the property of Premier, Inc. and is used by the investigators as part of a data use agreement that does not allow the data to be shared outside of the investigators institution.
